# Supplementary material for: Widespread increase of root zone storage capacity in the United States
Source: Copernicus journal article supplement (doi:10.5194/egusphere-2024-550), 2024-03-11
Supplement: Supplementary file 1 [file egusphere-2024-550-supplement.pdf]

| id       | lat      | lon       | Cluster |
|----------|----------|-----------|---------|
| 01073000 | 43.1487  | -70.96506 | 1       |
| 01118300 | 41.47482 | -71.83424 | 1       |
| 01121000 | 41.84371 | -72.16897 | 1       |
| 01123000 | 41.67177 | -72.0523  | 1       |
| 01162500 | 42.68259 | -72.11508 | 1       |
| 01187300 | 42.03732 | -72.93899 | 1       |
| 01350000 | 42.31953 | -74.43654 | 1       |
| 01350140 | 42.42897 | -74.47293 | 1       |
| 01411300 | 39.30694 | -74.82056 | 1       |
| 01413500 | 42.14481 | -74.65349 | 1       |
| 01414500 | 42.1062  | -74.73043 | 1       |
| 01415000 | 42.12009 | -74.81849 | 1       |
| 01423000 | 42.1662  | -75.13989 | 1       |
| 01439500 | 41.08815 | -75.03767 | 1       |
| 01440000 | 41.10667 | -74.95222 | 1       |
| 01440400 | 41.08481 | -75.21462 | 1       |
| 01451800 | 40.66176 | -75.62685 | 1       |
| 01466500 | 39.885   | -74.50528 | 1       |
| 01484100 | 38.90578 | -75.51275 | 1       |
| 01485500 | 38.22892 | -75.47144 | 1       |
| 01486000 | 38.21389 | -75.67139 | 1       |
| 01487000 | 38.72833 | -75.56186 | 1       |
| 01491000 | 38.99719 | -75.78581 | 1       |
| 01510000 | 42.54118 | -75.89964 | 1       |
| 01516500 | 41.79091 | -77.01469 | 1       |
| 01532000 | 41.70702 | -76.48467 | 1       |
| 01539000 | 41.07814 | -76.43106 | 1       |
| 01542810 | 41.57895 | -78.29251 | 1       |
| 01543000 | 41.4134  | -78.19695 | 1       |
| 01543500 | 41.31728 | -78.10306 | 1       |
| 01544500 | 41.4759  | -77.82582 | 1       |
| 01545600 | 41.38951 | -77.69082 | 1       |
| 01547700 | 41.05951 | -77.60583 | 1       |
| 01548500 | 41.52174 | -77.44748 | 1       |
| 01549500 | 41.47368 | -77.23081 | 1       |
| 01550000 | 41.41841 | -77.03275 | 1       |
| 01552000 | 41.32508 | -76.91246 | 1       |
| 01552500 | 41.35702 | -76.53467 | 1       |
| 01557500 | 40.68367 | -78.23362 | 1       |
| 01567500 | 40.37092 | -77.40221 | 1       |
| 01568000 | 40.32342 | -77.16887 | 1       |
| 01580000 | 39.62997 | -76.40331 | 1       |
| 01583500 | 39.51078 | -76.6765  | 1       |
| 01591400 | 39.25597 | -77.05106 | 1       |
| 01596500 | 39.57006 | -79.10194 | 1       |
| 01605500 | 38.63567 | -79.33782 | 1       |
| 01606500 | 38.99122 | -79.17587 | 1       |
| 01613050 | 39.89842 | -78.13223 | 1       |
| 01620500 | 38.33763 | -79.24004 | 1       |
| 01632000 | 38.63706 | -78.8528  | 1       |

|          |          |           |   |
|----------|----------|-----------|---|
| 01632900 | 38.69345 | -78.64279 | 1 |
| 01634500 | 39.08122 | -78.32945 | 1 |
| 01638480 | 39.25455 | -77.57638 | 1 |
| 01639500 | 39.61236 | -77.23744 | 1 |
| 01644000 | 39.01955 | -77.57749 | 1 |
| 01664000 | 38.53068 | -77.8136  | 1 |
| 01666500 | 38.32513 | -78.09556 | 1 |
| 01667500 | 38.35041 | -77.975   | 1 |
| 01669000 | 37.87708 | -76.90052 | 1 |
| 02011400 | 38.04235 | -79.88144 | 1 |
| 02011460 | 38.2454  | -79.76866 | 1 |
| 02013000 | 37.8029  | -80.047   | 1 |
| 02014000 | 37.72901 | -80.04228 | 1 |
| 02015700 | 38.1954  | -79.57032 | 1 |
| 02016000 | 37.7918  | -79.75949 | 1 |
| 02017500 | 37.50624 | -80.10671 | 1 |
| 02018000 | 37.66596 | -79.91144 | 1 |
| 02027000 | 37.71542 | -78.98169 | 1 |
| 02027500 | 37.70236 | -79.02752 | 1 |
| 02028500 | 37.86959 | -78.82335 | 1 |
| 02038850 | 37.41542 | -78.63584 | 1 |
| 02053200 | 36.37083 | -77.02556 | 1 |
| 02053800 | 37.14013 | -80.26643 | 1 |
| 02055100 | 37.41763 | -79.93532 | 1 |
| 02056900 | 37.04514 | -79.8442  | 1 |
| 02059500 | 37.1732  | -79.52031 | 1 |
| 02064000 | 37.12681 | -78.95974 | 1 |
| 02065500 | 37.07931 | -78.76362 | 1 |
| 02069700 | 36.57097 | -80.12949 | 1 |
| 02070000 | 36.56819 | -79.98726 | 1 |
| 02074500 | 36.61958 | -79.50419 | 1 |
| 02082950 | 36.18333 | -77.87611 | 1 |
| 02092500 | 35.06417 | -77.46139 | 1 |
| 02102908 | 35.18278 | -79.1775  | 1 |
| 02108000 | 34.82889 | -77.83222 | 1 |
| 02111500 | 36.175   | -81.16889 | 1 |
| 02118500 | 36.00056 | -80.74556 | 1 |
| 02143000 | 35.68444 | -81.40333 | 1 |
| 02143040 | 35.59069 | -81.56704 | 1 |
| 02149000 | 35.42345 | -82.1115  | 1 |
| 02152100 | 35.49306 | -81.68222 | 1 |
| 02361000 | 31.34295 | -85.61049 | 1 |
| 02369800 | 31.02768 | -86.70996 | 1 |
| 02371500 | 31.5735  | -86.25162 | 1 |
| 02372250 | 31.59627 | -86.40552 | 1 |
| 02374500 | 31.4185  | -86.98664 | 1 |
| 02422500 | 32.58291 | -86.9036  | 1 |
| 02430085 | 34.46667 | -88.28361 | 1 |
| 02450250 | 34.28538 | -87.39891 | 1 |
| 02464000 | 33.47928 | -87.59723 | 1 |
| 02465493 | 32.99735 | -87.62223 | 1 |

|          |           |            |   |
|----------|-----------|------------|---|
| 02469800 | 31. 74432 | -88. 02251 | 1 |
| 02472000 | 31. 70694 | -89. 40694 | 1 |
| 02472500 | 31. 42583 | -89. 41472 | 1 |
| 02479155 | 31. 02528 | -89. 01667 | 1 |
| 02479300 | 30. 73611 | -88. 78111 | 1 |
| 02479560 | 30. 80908 | -88. 45863 | 1 |
| 02481510 | 30. 48361 | -89. 27444 | 1 |
| 03010655 | 41. 96173 | -78. 19807 | 1 |
| 03011800 | 41. 76645 | -78. 71864 | 1 |
| 03015500 | 41. 85256 | -79. 31727 | 1 |
| 03021350 | 42. 01533 | -79. 78255 | 1 |
| 03026500 | 41. 63117 | -78. 57669 | 1 |
| 03028000 | 41. 57534 | -78. 69225 | 1 |
| 03049000 | 40. 7159  | -79. 69949 | 1 |
| 03049800 | 40. 52035 | -79. 93811 | 1 |
| 03070500 | 39. 61564 | -79. 70477 | 1 |
| 03076600 | 39. 65614 | -79. 39411 | 1 |
| 03078000 | 39. 70219 | -79. 13639 | 1 |
| 03140000 | 40. 36285 | -81. 86236 | 1 |
| 03144000 | 40. 13257 | -82. 14792 | 1 |
| 03159540 | 39. 06369 | -81. 8818  | 1 |
| 03164000 | 36. 64735 | -80. 97897 | 1 |
| 03165000 | 36. 64596 | -80. 91924 | 1 |
| 03170000 | 37. 03763 | -80. 55672 | 1 |
| 03173000 | 37. 26818 | -80. 70951 | 1 |
| 03182500 | 38. 18595 | -80. 13062 | 1 |
| 03213700 | 37. 67316 | -82. 28014 | 1 |
| 03237280 | 38. 64369 | -83. 21574 | 1 |
| 03237500 | 38. 80368 | -83. 42102 | 1 |
| 03241500 | 39. 72284 | -83. 88271 | 1 |
| 03280700 | 37. 16509 | -83. 30796 | 1 |
| 03281500 | 37. 47981 | -83. 67519 | 1 |
| 03285000 | 37. 64202 | -84. 66078 | 1 |
| 03291780 | 38. 87811 | -85. 25718 | 1 |
| 03300400 | 37. 83284 | -85. 29607 | 1 |
| 03340800 | 39. 81255 | -86. 9539  | 1 |
| 03346000 | 39. 01004 | -87. 94559 | 1 |
| 03357350 | 39. 76171 | -86. 72945 | 1 |
| 03364500 | 39. 27477 | -85. 70165 | 1 |
| 03366500 | 38. 80422 | -85. 67386 | 1 |
| 03368000 | 39. 07033 | -85. 48608 | 1 |
| 03384450 | 37. 47227 | -88. 54727 | 1 |
| 03471500 | 36. 76039 | -81. 63123 | 1 |
| 03473000 | 36. 65178 | -81. 84401 | 1 |
| 03479000 | 36. 23917 | -81. 82222 | 1 |
| 03488000 | 36. 89678 | -81. 74623 | 1 |
| 03498500 | 35. 78562 | -83. 8846  | 1 |
| 03574500 | 34. 62425 | -86. 30637 | 1 |
| 03604000 | 35. 49591 | -87. 8328  | 1 |
| 04105700 | 42. 35337 | -85. 35389 | 1 |
| 04122200 | 43. 46418 | -86. 23257 | 1 |

|          |          |            |   |
|----------|----------|------------|---|
| 04122500 | 43.94501 | -86.27869  | 1 |
| 04185000 | 41.5045  | -84.42967  | 1 |
| 04197100 | 41.02228 | -83.10964  | 1 |
| 04216418 | 42.86395 | -78.28363  | 1 |
| 04221000 | 42.12229 | -77.95722  | 1 |
| 04224775 | 42.53562 | -77.70416  | 1 |
| 05525500 | 40.63004 | -87.72392  | 1 |
| 05592050 | 39.40587 | -88.89646  | 1 |
| 05593575 | 38.44172 | -89.41675  | 1 |
| 05593900 | 39.14894 | -89.35231  | 1 |
| 05595730 | 38.25394 | -89.03979  | 1 |
| 06921070 | 37.68265 | -93.37033  | 1 |
| 06921200 | 37.75047 | -93.26618  | 1 |
| 07014500 | 38.15853 | -91.10846  | 1 |
| 07056000 | 35.98318 | -92.74755  | 1 |
| 07057500 | 36.62303 | -92.24813  | 1 |
| 07060710 | 35.99535 | -92.21265  | 1 |
| 07066000 | 37.15408 | -91.35816  | 1 |
| 07067000 | 36.99138 | -91.01351  | 1 |
| 07068000 | 36.622   | -90.84762  | 1 |
| 07071500 | 36.64868 | -91.20082  | 1 |
| 07195800 | 36.25548 | -94.43394  | 1 |
| 07196900 | 35.88008 | -94.48661  | 1 |
| 07197000 | 35.9212  | -94.83856  | 1 |
| 07335700 | 34.63844 | -94.61272  | 1 |
| 07340300 | 34.37955 | -94.23576  | 1 |
| 07362100 | 33.37596 | -92.77711  | 1 |
| 07375000 | 30.61602 | -90.24869  | 1 |
| 08014500 | 30.69875 | -92.89319  | 1 |
| 10263500 | 34.42083 | -117.83951 | 1 |
| 11383500 | 40.01405 | -121.94832 | 1 |
| 11451100 | 39.16545 | -122.61999 | 1 |
| 11468500 | 39.42822 | -123.73779 | 1 |
| 11473900 | 39.70627 | -123.32529 | 1 |
| 11528700 | 40.64986 | -123.4942  | 1 |
| 12073500 | 47.38926 | -122.69902 | 1 |
| 02231342 | 27.56865 | -80.79617  | 2 |
| 02245500 | 29.97941 | -81.85204  | 2 |
| 02246000 | 30.1133  | -81.90649  | 2 |
| 02296500 | 27.37504 | -81.79647  | 2 |
| 02297155 | 27.48726 | -82.02342  | 2 |
| 04024430 | 46.63327 | -92.09408  | 2 |
| 04027000 | 46.48661 | -90.6963   | 2 |
| 04040500 | 46.58411 | -88.57597  | 2 |
| 04045500 | 46.57502 | -85.26955  | 2 |
| 04057510 | 45.94302 | -86.7057   | 2 |
| 04057800 | 46.4991  | -87.88652  | 2 |
| 04059500 | 45.75552 | -87.20152  | 2 |
| 04063700 | 45.76357 | -88.46318  | 2 |
| 04124000 | 44.43639 | -85.69868  | 2 |
| 04127997 | 45.27446 | -84.60003  | 2 |

|          |          |            |   |
|----------|----------|------------|---|
| 05123400 | 48.58889 | -100.44208 | 2 |
| 05362000 | 45.30803 | -90.95652  | 2 |
| 05393500 | 45.44913 | -89.97931  | 2 |
| 05408000 | 43.57414 | -90.64319  | 2 |
| 05412500 | 42.73999 | -91.2618   | 2 |
| 05413500 | 42.72027 | -90.81929  | 2 |
| 05414000 | 42.7311  | -90.64041  | 2 |
| 05444000 | 41.90281 | -89.69622  | 2 |
| 05454000 | 41.70002 | -91.48767  | 2 |
| 05458000 | 43.03328 | -92.50354  | 2 |
| 05466500 | 41.18698 | -90.96737  | 2 |
| 05487980 | 41.24688 | -93.26607  | 2 |
| 05489000 | 41.219   | -92.90853  | 2 |
| 05495000 | 40.39241 | -91.59788  | 2 |
| 05495500 | 40.14282 | -91.33737  | 2 |
| 05501000 | 39.81799 | -91.5177   | 2 |
| 05503800 | 39.58483 | -91.99349  | 2 |
| 05507600 | 39.43143 | -91.67627  | 2 |
| 05508805 | 39.52046 | -91.34275  | 2 |
| 05514500 | 39.0088  | -90.97754  | 2 |
| 05556500 | 41.36587 | -89.49843  | 2 |
| 05584500 | 40.33032 | -90.89624  | 2 |
| 05585000 | 40.02477 | -90.63179  | 2 |
| 06404000 | 43.87249 | -103.33658 | 2 |
| 06601000 | 42.32158 | -96.48768  | 2 |
| 06803510 | 40.89311 | -96.68155  | 2 |
| 06803530 | 41.0157  | -96.54428  | 2 |
| 06814000 | 39.94778 | -96.10862  | 2 |
| 06876700 | 39.13907 | -97.83696  | 2 |
| 06878000 | 39.03111 | -97.04029  | 2 |
| 06879650 | 39.10195 | -96.59521  | 2 |
| 06885500 | 39.68192 | -96.44289  | 2 |
| 06888500 | 39.06265 | -96.15025  | 2 |
| 06889200 | 39.23833 | -95.8886   | 2 |
| 06889500 | 39.09938 | -95.72495  | 2 |
| 06892000 | 39.11633 | -95.01088  | 2 |
| 06903400 | 40.95189 | -93.25985  | 2 |
| 06910800 | 38.56701 | -95.96163  | 2 |
| 06911900 | 38.71069 | -95.83603  | 2 |
| 06917000 | 38.01897 | -94.71367  | 2 |
| 06918460 | 37.40237 | -93.80203  | 2 |
| 06919500 | 37.8342  | -93.87549  | 2 |
| 07145700 | 37.24955 | -97.4039   | 2 |
| 07167500 | 37.70821 | -96.2236   | 2 |
| 07180500 | 38.19645 | -96.82458  | 2 |
| 07184000 | 37.28125 | -95.03267  | 2 |
| 08079600 | 33.03843 | -101.19763 | 2 |
| 08082700 | 33.32927 | -99.46508  | 2 |
| 08086290 | 32.64846 | -99.00451  | 2 |
| 08194200 | 27.96501 | -98.96697  | 2 |
| 08202700 | 29.37079 | -99.28782  | 2 |

|          |          |            |   |
|----------|----------|------------|---|
| 08269000 | 36.43947 | -105.50362 | 2 |
| 08377900 | 35.77725 | -105.65807 | 2 |
| 08378500 | 35.70837 | -105.68252 | 2 |
| 08380500 | 35.65199 | -105.3189  | 2 |
| 09047700 | 39.59443 | -105.97252 | 2 |
| 09210500 | 42.09605 | -110.41656 | 2 |
| 09223000 | 42.11049 | -110.70962 | 2 |
| 09312600 | 39.87579 | -111.03739 | 2 |
| 09492400 | 33.82227 | -109.81454 | 2 |
| 10172800 | 40.49633 | -112.5744  | 2 |
| 10173450 | 37.62276 | -112.51688 | 2 |
| 10205030 | 38.91191 | -111.53047 | 2 |
| 10234500 | 38.28053 | -112.56827 | 2 |
| 10242000 | 37.6722  | -113.03467 | 2 |
| 10244950 | 39.20154 | -114.68916 | 2 |
| 10249300 | 38.88743 | -117.24537 | 2 |
| 10343500 | 39.43157 | -120.23798 | 2 |
| 10396000 | 42.79083 | -118.8675  | 2 |
| 12390700 | 47.58605 | -115.35515 | 2 |
| 13338500 | 46.08639 | -115.97667 | 2 |
| 06746095 | 40.53998 | -105.88279 | 3 |
| 12178100 | 48.65596 | -121.23846 | 3 |
| 12186000 | 48.16872 | -121.47067 | 3 |
| 12189500 | 48.42456 | -121.56846 | 3 |
| 12451000 | 48.32958 | -120.69177 | 3 |
| 14158500 | 44.36095 | -121.99562 | 3 |
| 02298123 | 27.052   | -81.78453  | 4 |
| 02298608 | 27.34366 | -82.15676  | 4 |
| 02299950 | 27.47365 | -82.2112   | 4 |
| 02300700 | 27.79197 | -82.35204  | 4 |
| 06278300 | 44.50802 | -107.40369 | 4 |
| 06280300 | 44.20828 | -109.55489 | 4 |
| 06289000 | 45.00691 | -107.61509 | 4 |
| 06311000 | 44.02774 | -107.08089 | 4 |
| 06614800 | 40.49609 | -105.86501 | 4 |
| 06622700 | 41.37024 | -106.52058 | 4 |
| 06623800 | 41.02358 | -106.82477 | 4 |
| 06632400 | 41.58525 | -106.22279 | 4 |
| 07083000 | 39.17221 | -106.38919 | 4 |
| 08267500 | 36.54169 | -105.5564  | 4 |
| 08271000 | 36.50836 | -105.53084 | 4 |
| 09034900 | 39.76026 | -105.9064  | 4 |
| 09065500 | 39.62582 | -106.27808 | 4 |
| 09066000 | 39.59638 | -106.26503 | 4 |
| 09066200 | 39.64832 | -106.32308 | 4 |
| 09066300 | 39.64582 | -106.38225 | 4 |
| 09081600 | 39.23221 | -107.22727 | 4 |
| 09352900 | 37.4775  | -107.54367 | 4 |
| 10316500 | 40.69076 | -115.477   | 4 |
| 11264500 | 37.73159 | -119.55877 | 4 |
| 11266500 | 37.71687 | -119.66628 | 4 |

|          |           |             |   |
|----------|-----------|-------------|---|
| 12414500 | 47. 27464 | -116. 18905 | 4 |
| 12447390 | 48. 82292 | -120. 14592 | 4 |
| 12488500 | 46. 97762 | -121. 1687  | 4 |
| 13011500 | 43. 85028 | -110. 51778 | 4 |
| 13018300 | 43. 45215 | -110. 70409 | 4 |
| 13023000 | 43. 14278 | -110. 97667 | 4 |
| 13235000 | 44. 08528 | -115. 62222 | 4 |
| 13240000 | 44. 91361 | -115. 99722 | 4 |
| 13313000 | 44. 96167 | -115. 5     | 4 |
| 13331500 | 45. 61987 | -117. 72659 | 4 |
| 13337000 | 46. 15083 | -115. 58722 | 4 |
| 13340000 | 46. 47833 | -116. 2575  | 4 |
| 13340600 | 46. 84047 | -115. 6207  | 4 |
| 12054000 | 47. 68398 | -123. 01155 | 5 |
| 12056500 | 47. 51426 | -123. 32989 | 5 |
| 12114500 | 47. 34205 | -121. 54899 | 5 |
| 12115000 | 47. 37011 | -121. 6251  | 5 |
| 12147500 | 47. 71232 | -121. 78873 | 5 |
| 12147600 | 47. 70677 | -121. 60011 | 5 |
| 11475560 | 39. 7296  | -123. 64391 | 6 |
| 11476600 | 40. 35125 | -124. 00393 | 6 |
| 11478500 | 40. 48042 | -123. 89088 | 6 |
| 11481200 | 41. 01096 | -124. 08173 | 6 |
| 12013500 | 46. 65093 | -123. 65266 | 6 |
| 12020000 | 46. 61732 | -123. 27764 | 6 |
| 12145500 | 47. 53982 | -121. 909   | 6 |
| 14154500 | 43. 73596 | -122. 8734  | 6 |
| 14166500 | 44. 04984 | -123. 42621 | 6 |
| 14301000 | 45. 704   | -123. 7554  | 6 |
| 14306500 | 44. 38595 | -123. 83178 | 6 |
| 14309500 | 42. 804   | -123. 61091 | 6 |
| 14316700 | 43. 34984 | -122. 72894 | 6 |
| 14325000 | 42. 8915  | -124. 07065 | 6 |
| 11532500 | 41. 7915  | -124. 07619 | 7 |
| 12010000 | 46. 37399 | -123. 74348 | 7 |
| 12025700 | 46. 7726  | -122. 59401 | 7 |
| 12035000 | 47. 00065 | -123. 49488 | 7 |
| 12115500 | 47. 35066 | -121. 66316 | 7 |
| 12117000 | 47. 38649 | -121. 84622 | 7 |
| 12167000 | 48. 26149 | -122. 04764 | 7 |
| 14138800 | 45. 45262 | -121. 89147 | 7 |
| 14138870 | 45. 48012 | -122. 02564 | 7 |
| 14138900 | 45. 49429 | -122. 03592 | 7 |
| 14139800 | 45. 44456 | -122. 10953 | 7 |
| 14141500 | 45. 4154  | -122. 17148 | 7 |
| 14158790 | 44. 33457 | -122. 04701 | 7 |
| 14182500 | 44. 79151 | -122. 57897 | 7 |
| 14185000 | 44. 39179 | -122. 49758 | 7 |
| 14185900 | 44. 54012 | -122. 43591 | 7 |
| 14222500 | 45. 83678 | -122. 46621 | 7 |
| 14236200 | 46. 59538 | -122. 45956 | 7 |

|          |          |            |   |
|----------|----------|------------|---|
| 14305500 | 44.71512 | -123.88733 | 7 |
| 14400000 | 42.12344 | -124.18731 | 7 |
| 02231000 | 30.35885 | -82.0815   | 8 |
| 02312200 | 28.57277 | -82.15536  | 8 |
| 02324400 | 30.09827 | -83.47181  | 8 |
| 05056000 | 47.80555 | -98.71622  | 8 |
| 05057000 | 47.43277 | -98.0276   | 8 |
| 05057200 | 47.22916 | -98.12482  | 8 |
| 05120500 | 48.13834 | -100.53986 | 8 |
| 05291000 | 45.29163 | -96.48756  | 8 |
| 06332515 | 47.78724 | -102.76853 | 8 |
| 06339100 | 47.23613 | -102.76991 | 8 |
| 06339500 | 47.15445 | -102.05989 | 8 |
| 06344600 | 47.02779 | -103.05324 | 8 |
| 06350000 | 46.42667 | -102.55183 | 8 |
| 06352000 | 46.15417 | -102.47405 | 8 |
| 06353000 | 46.09167 | -101.33374 | 8 |
| 06354000 | 46.37611 | -100.93444 | 8 |
| 06360500 | 45.25582 | -100.84292 | 8 |
| 06431500 | 44.48248 | -103.86159 | 8 |
| 06468170 | 47.55805 | -98.86289  | 8 |
| 06470800 | 46.22524 | -98.07177  | 8 |
| 06853800 | 39.89925 | -98.25043  | 8 |
| 07148400 | 36.81503 | -98.64814  | 8 |
| 07151500 | 37.12891 | -97.60144  | 8 |
| 07208500 | 36.37226 | -104.97    | 8 |
| 07299670 | 34.35452 | -99.74037  | 8 |
| 07301500 | 35.16811 | -99.50731  | 8 |
| 07315200 | 33.81288 | -98.08504  | 8 |
| 07315700 | 34.00426 | -97.56697  | 8 |
| 08086212 | 32.7329  | -99.14063  | 8 |
| 08101000 | 31.28489 | -97.88502  | 8 |
| 08103900 | 30.91157 | -98.03697  | 8 |
| 08104900 | 30.62575 | -97.69112  | 8 |
| 08150800 | 30.64352 | -99.09588  | 8 |
| 08158700 | 30.08299 | -98.00779  | 8 |
| 08158810 | 30.15549 | -97.94001  | 8 |
| 08164000 | 28.95998 | -96.68637  | 8 |
| 08164600 | 28.89138 | -96.81915  | 8 |
| 08171300 | 29.97938 | -97.91     | 8 |
| 08175000 | 29.21525 | -97.44943  | 8 |
| 08189500 | 28.29195 | -97.27916  | 8 |
| 08190000 | 29.42857 | -99.99729  | 8 |
| 08195000 | 29.48857 | -99.70478  | 8 |
| 08196000 | 29.50468 | -99.78145  | 8 |
| 08200000 | 29.56967 | -99.24671  | 8 |
| 08324000 | 35.66169 | -106.74337 | 8 |
| 09378630 | 37.75555 | -109.47651 | 8 |
| 09386900 | 35.28253 | -108.55341 | 8 |
| 09430500 | 33.06118 | -108.53727 | 8 |
| 09430600 | 33.16673 | -108.64978 | 8 |



|          |          |            |    |
|----------|----------|------------|----|
| 09494000 | 33.73644 | -110.16677 | 8  |
| 09505350 | 34.72863 | -111.77571 | 8  |
| 09510200 | 33.69421 | -111.5418  | 8  |
| 09513780 | 33.9742  | -112.09905 | 8  |
| 10329500 | 41.53462 | -117.41791 | 8  |
| 13161500 | 41.93324 | -115.67453 | 8  |
| 01658500 | 38.58734 | -77.4286   | 9  |
| 02046000 | 37.06709 | -77.60249  | 9  |
| 02051500 | 36.71681 | -77.83166  | 9  |
| 02077200 | 36.39778 | -79.19667  | 9  |
| 02081500 | 36.19417 | -78.58306  | 9  |
| 02128000 | 35.38722 | -79.83139  | 9  |
| 02212600 | 33.09985 | -83.72351  | 9  |
| 02221525 | 33.25236 | -83.48128  | 9  |
| 02349900 | 32.19556 | -83.90222  | 9  |
| 07346045 | 32.77792 | -94.35742  | 9  |
| 07373000 | 31.53629 | -92.40847  | 9  |
| 08029500 | 30.81889 | -93.78556  | 9  |
| 08066200 | 30.71631 | -94.95882  | 9  |
| 08070000 | 30.3366  | -95.1041   | 9  |
| 08109700 | 30.33938 | -96.9047   | 9  |
| 08164300 | 29.46691 | -96.81276  | 9  |
| 08165300 | 30.0641  | -99.38699  | 9  |
| 08190500 | 29.47273 | -100.23646 | 9  |
| 09404450 | 37.33943 | -112.60438 | 9  |
| 09497980 | 33.82783 | -110.85623 | 9  |
| 09505800 | 34.53864 | -111.69404 | 9  |
| 09508300 | 34.16087 | -111.69292 | 9  |
| 10258500 | 33.74502 | -116.53557 | 9  |
| 10259000 | 33.76002 | -116.55002 | 9  |
| 10259200 | 33.63114 | -116.39223 | 9  |
| 11098000 | 34.22223 | -118.17757 | 9  |
| 11124500 | 34.59666 | -119.90875 | 9  |
| 11141280 | 35.23553 | -120.47239 | 9  |
| 11148900 | 35.78858 | -121.09381 | 9  |
| 11162500 | 37.26078 | -122.32886 | 9  |
| 11176400 | 37.56132 | -121.68384 | 9  |
| 11180500 | 37.60605 | -122.02385 | 9  |
| 11180960 | 37.71771 | -122.05441 | 9  |
| 11224500 | 36.21468 | -120.47071 | 9  |
| 11253310 | 36.40217 | -120.43349 | 9  |
| 11274500 | 37.31549 | -121.12521 | 9  |
| 11274630 | 37.4866  | -121.2091  | 9  |
| 11284400 | 37.84187 | -120.18491 | 9  |
| 01022500 | 44.60797 | -67.93524  | 10 |
| 01031500 | 45.17501 | -69.3147   | 10 |
| 01047000 | 44.8692  | -69.9551   | 10 |
| 01052500 | 44.87739 | -71.05749  | 10 |
| 01054200 | 44.39044 | -70.97964  | 10 |
| 01055000 | 44.64275 | -70.58878  | 10 |
| 01057000 | 44.30399 | -70.53968  | 10 |

|          |          |            |    |
|----------|----------|------------|----|
| 01078000 | 43.56646 | -71.74786  | 10 |
| 01134500 | 44.51172 | -71.83731  | 10 |
| 01137500 | 44.26867 | -71.63036  | 10 |
| 01139000 | 44.15034 | -72.06509  | 10 |
| 01139800 | 44.09284 | -72.33565  | 10 |
| 01142500 | 43.93451 | -72.65788  | 10 |
| 01144000 | 43.71424 | -72.41815  | 10 |
| 01169000 | 42.63842 | -72.72509  | 10 |
| 01170100 | 42.70342 | -72.67065  | 10 |
| 01181000 | 42.23731 | -72.89565  | 10 |
| 01333000 | 42.70897 | -73.19677  | 10 |
| 01365000 | 41.86648 | -74.4871   | 10 |
| 01435000 | 41.89009 | -74.58988  | 10 |
| 02111180 | 36.07139 | -81.40306  | 10 |
| 02177000 | 34.81398 | -83.30599  | 10 |
| 02178400 | 34.89037 | -83.53044  | 10 |
| 02327100 | 30.12937 | -84.49435  | 10 |
| 02381600 | 34.57037 | -84.46882  | 10 |
| 03066000 | 39.12705 | -79.46838  | 10 |
| 03069500 | 39.12288 | -79.68117  | 10 |
| 03161000 | 36.39333 | -81.40694  | 10 |
| 03186500 | 38.379   | -80.48397  | 10 |
| 03439000 | 35.14333 | -82.82472  | 10 |
| 03455500 | 35.39611 | -82.9375   | 10 |
| 03456500 | 35.46167 | -82.86972  | 10 |
| 03460000 | 35.6675  | -83.07361  | 10 |
| 03463300 | 35.83151 | -82.18429  | 10 |
| 03500000 | 35.15    | -83.37972  | 10 |
| 03500240 | 35.15889 | -83.39417  | 10 |
| 03504000 | 35.1275  | -83.61861  | 10 |
| 04043050 | 47.22854 | -88.38539  | 10 |
| 04256000 | 43.74729 | -75.33435  | 10 |
| 04296000 | 44.86894 | -72.2701   | 10 |
| 11381500 | 40.0546  | -122.02415 | 10 |
| 11522500 | 41.37763 | -123.47756 | 10 |
| 11523200 | 41.11126 | -122.70558 | 10 |
| 12048000 | 48.01426 | -123.13268 | 10 |
| 12411000 | 47.70611 | -115.97917 | 10 |
| 14020000 | 45.71958 | -118.32329 | 10 |
